1  
2  
3  
4  
5  
6  
7  
8  
9  
10  
11  
12  
13  
14  
15  
16  
17  
18  
19  
20  
21  
22  
23  
24  
25  
26  
27  
28  
29  
30  
31  
32  
33  
34  
35  
36  
37  
38  
39  
40

# Metacognitive Judgments during Visuomotor Learning Reflect the Integration of Error History

Christopher L. Hewitson<sup>1</sup>, Naser Al-Fawakhiri<sup>1</sup>, & Samuel D. McDougle<sup>1,2</sup>

1. Department of Psychology, Yale University, New Haven CT 06520  
2. Wu Tsai Institute, Yale University, New Haven CT 06520

**Running head: Confidence during Visuomotor Learning Reflect Error History**

*Correspondence:* Christopher L. Hewitson  
*christopher.hewitson@yale.edu*  
Department of Psychology  
Yale University  
2 Hillhouse Avenue, New Haven, CT, 06520

## AUTHOR EMAILS

*christopher.hewitson@yale.edu*  
*naser.al-fawakhiri@yale.edu*  
*samuel.mcdougle@yale.edu*

## AUTHOR CONTRIBUTIONS

C.L.H and S.D.M designed the paradigm; C.L.H collected data. C.L.H and N.A analyzed data. C.L.H, N.A and S.D.M prepared figures, drafted manuscript, edited, and revised manuscript.

## AUTHOR FUNDING

Christopher Louis Hewitson was funded by Yale University's Seesel Postdoctoral Fellowship.

Pages: 30  
Figures: 4  
Tables: 2  
Supplemental: 1 table

# Metacognitive Judgments during Visuomotor Learning Reflect the Integration of Error History

Christopher L. Hewitson<sup>1</sup>, Naser Al-Fawakhiri<sup>1</sup>, & Samuel D. McDougle<sup>1,2</sup>

1. Department of Psychology, Yale University, New Haven CT 06520

2. Wu Tsai Institute, Yale University, New Haven CT 06520

*Correspondence:* Christopher L. Hewitson

Department of Psychology

Yale University

*Email:* [christopher.hewitson@yale.edu](mailto:christopher.hewitson@yale.edu)

## ABSTRACT

People form higher-level, metacognitive representations of their own abilities across a range of tasks. Here we ask how metacognitive confidence judgments of performance during motor learning are shaped by the learner's recent history of errors. Across two motor adaptation experiments, our computational modeling approach demonstrated that people's confidence judgments are best explained by a recency-weighted averaging of observed motor errors. Moreover, in the formation of these confidence estimates, people appear to re-weight observed motor errors according to a subjective cost function. Finally, confidence judgments appeared to incorporate recent motor errors in a manner that was sensitive to the volatility of the learning environment, integrating a shallower history when the environment was more volatile. Our study provides a novel descriptive model that successfully approximates the dynamics of metacognitive judgments during motor learning.

## NEW & NOTEWORTHY

This study examined how, during visuomotor learning, people's confidence in their movement decisions is shaped by their recent history of errors. Using computational modeling, we found that confidence judgments incorporated recent error history, tracked subjective error costs, and were sensitive to environmental volatility. Together, these results provide a novel model of metacognitive judgments during motor learning that could be applied to future computational and neural studies at the interface of higher-order cognition and motor behavior.

## 73 INTRODUCTION

74 Humans have the ability to monitor qualities of their own performance in a task, a capacity often  
75 referred to as “metacognition.” Metacognitive processes have been observed across a range of  
76 tasks, including simple perceptual decision-making (1), reinforcement learning (2), social  
77 cognition (3), and memory (4). Over a century of research has shown that people’s  
78 metacognitive judgements (such as their explicitly reported confidence in their choices/abilities)  
79 often closely track behavioral metrics like accuracy and response time (5).

80  
81 In one of the most studied laboratory models of metacognition and confidence – perceptual  
82 decision-making – researchers have used computational models to uncover strong links  
83 between one’s confidence in a choice (e.g., ‘those dots are mostly moving left’) and the  
84 perceptual evidence they have accumulated for that choice over its competitors (6–8).  
85 Moreover, researchers have even discovered certain neural populations that simultaneously  
86 encode both accumulated evidence and decision confidence (9). Here, we turn to a domain that  
87 has been less well studied with respect to metacognition – sensorimotor learning.

88  
89 Unlike making discrete, independent decisions about incoming sense data, learning requires  
90 integrating information over protracted periods. Thus, metacognitive awareness of your state of  
91 learning requires tracking your progress across time. Consider practicing your tennis serve over  
92 a series of attempts: Your metacognitive judgment of your current ability (e.g., your confidence  
93 in any given serve attempt) should, in principle, take into account your recent history of  
94 feedback (i.e., your errors). But how does one’s state of confidence integrate these errors,  
95 especially when they are in a continuous domain (i.e., like most motor learning tasks)? And how  
96 does confidence relate to second order statistics of learning, like the volatility of the environment  
97 (e.g., a particularly windy day on the courts) (10)?

98  
99 There has been some recent research on confidence and learning in nonmotor domains. One  
100 recent study (11) used a perceptual decision task in which participants reported their estimate of  
101 the transition probabilities between two visual or auditory stimuli as well as their confidence in  
102 this report. The results indicated that participants not only learn a statistical model of transition  
103 probabilities over time, but also that their confidence ratings closely track this statistical  
104 inference. This work demonstrates that in a perceptual decision-making context, people’s

105 confidence judgments closely correlate with their performance in tracking stochastic variables  
106 over time (12).

107

108 Other work from the reinforcement learning domain has suggested that confidence in one's  
109 choices during learning evolves along with learned latent value representations, and is subject  
110 to value-driven biases (2). Moreover, volatility in an environment, a second order statistic  
111 tracked over many trials, induces uncertainty in an agent, and agents tend to operate with a  
112 faster learning rate in these uncertain environments (13). This work suggests that higher-order  
113 variables like confidence may also correspond to the statistical uncertainty that underpins the  
114 learning process itself (14, 15).

115

116 Subjective confidence in the domain of motor learning has been less well studied, but some  
117 work has attempted to capture the role of continuous motor errors on subjective evaluations of  
118 confidence. For instance, one recent study (16) showed that individuals are able to predict their  
119 future performance, and also leverage their confidence in their future performance to maximize  
120 future rewards. Another recent study (17) demonstrated that subjective confidence tracks  
121 precision in a continuous temporal estimation task. Some work on motor sequence learning has  
122 looked at a more 'zoomed-out' form of confidence – block- and day-level judgments of one's  
123 own ability (18). Lastly, recent computational work has shown that individuals might utilize  
124 information about their prior motor variability to make confidence judgments of their motor  
125 precision (19).

126

127 While these works suggest that confidence in a motor context integrates prior history of  
128 performance (perhaps in a Bayesian manner), they do not directly address metacognitive  
129 dynamics during the protracted adaptation of motor commands (20), the context of interest here.  
130 During motor adaptation, does confidence simply reveal a metacognitive readout of  
131 performance error at a given point in time, or does it represent the integration of a history of  
132 errors? And how do aspects of the learning context, such as the volatility of the environment,  
133 mediate the relationship between confidence and motor error? Addressing these questions can  
134 shed light on the psychological processes involved in motor learning, computationally isolate  
135 higher-level metacognitive variables for investigating in future neural studies, and perhaps be  
136 useful for increasing people's motivation to learn in clinical and non-clinical settings.

137

138 Here, we used a motor adaptation task that involves modulating movement kinematics (i.e.,  
139 reaching directions), and asked how motor errors affect subjective confidence. We address this  
140 via two experiments and descriptive computational modeling. We specify a model of confidence  
141 during motor learning where trial-by-trial subjective confidence judgments are approximated by  
142 a simple linear dynamic system that tracks subjectively-weighted errors made during motor  
143 learning. This straightforward model outperforms other model variants that do not incorporate  
144 error history, and also reveals that the dynamics of confidence ratings during motor adaptation  
145 are sensitive to environmental volatility. Together, these results set the stage for future  
146 computational and neural investigations of people's higher-level metacognitive representations  
147 of the state of their own sensorimotor learning processes.

## 148 METHODS

### 149 *Participants*

150 A total of 38 neurologically healthy participants (Experiment 1: N = 18 ; Age = 21±5 years;  
151 Gender: 10 identified as Female, 1 preferred not to answer; Handedness: 16 right-handed [ $>40$   
152 on the Edinburgh handedness inventory (21). Experiment 2: N = 20; Age = 20±5 years; Gender:  
153 13 identified as Female; Handedness: 19 right-handed) from the Yale University subject pool  
154 participated in this study. They received monetary compensation or course credit for their  
155 participation. Written informed consent was obtained from all participants before testing and the  
156 experimental protocol was approved in accordance with Yale University's Institutional Review  
157 Board. No subjects were excluded from any of our analyses.

### 159 *Apparatus*

160 Participants sat on a height-adjustable chair facing a 24.5-in. LCD monitor (Asus VG259QM;  
161 display size: 543.74 mm x 302.62 mm; resolution: 1920 x 1080 pixels; frame rate 280 Hz; 1 ms  
162 response time), positioned horizontally ~30 cm in front of the participant above the table  
163 platform, thus preventing direct vision of the hand (Fig. 1A). In their dominant hand they held a  
164 stylus embedded within a custom modified paddle, which they could slide across a digitizing  
165 tablet (Wacom PTH860; active area: 311 mm x 216 mm). Hand position was recorded from the  
166 tip of the stylus sampled by the tablet at 200 Hz. Stimulus presentation and movement recording  
167 were controlled by a custom-built Octave script (GNU Octave v5.2.0; Psychtoolbox-3 v3.0.18;  
168 Ubuntu 20.04.4 LTS). Aiming and confidence ratings were controlled by the non-dominant hand  
169 and entered on a USB keyboard (Fig. 1B).

170

171 *Task*

172 Typical task trials consisted of an aiming phase, a confidence rating phase, and then a reaching  
173 phase (Fig. 1B). To briefly summarize the phases: During the aiming phase, participants were  
174 instructed to “position the aiming reticle where you intend to move your hand”; during the  
175 confidence reporting phase, participants were instructed to “rate how confident you are that  
176 where you aimed is correct”; and during the reach phase, subjects made rapid reaches to the  
177 displayed target.

178

179 During the reaching phase, participants performed center-out-reaching movements from a  
180 central start location in the center of the monitor to one of 8 visual targets (0°, 45°, 90°, 135°,  
181 180°, 225°, 270°, and 315°) arranged around an invisible circle with a radius of 10 cm. The  
182 target location for each trial was pseudo-randomly selected. Participants were instructed to  
183 move the stylus as quickly as possible from the start location in the direction of the displayed  
184 target and “slice through it.” The start location was marked by a filled white circle of 7 mm in  
185 diameter. The target locations were marked by filled green circles of 10 mm in diameter. Online  
186 visual feedback was given by a cursor (filled white circle, radius 2.5 mm). If the reach duration  
187 exceeded 400 ms, a text prompt appeared on the monitor reminding participants to “please  
188 speed up your reach,” and the trial was repeated but with a new target location.

189

190 During the aiming phase, a white crosshair 7 mm in diameter was overlaid on the target (Figure  
191 1B). Its movement was constrained to follow the arc of the invisible circle with a radius of 10 cm  
192 from the start location. The aiming crosshair’s location was adjusted with the left hand using the  
193 left and right arrow keys, which drove crosshair movements to the counterclockwise and  
194 clockwise directions, respectively. When participants were satisfied with the match between  
195 their intended reach direction and the aiming crosshair’s position, they then registered their aim  
196 with the ‘enter’ key.

197

198 During the confidence rating phase, which directly followed the aiming phase, a rating bar  
199 (20mm x 40mm) was displayed 15° counterclockwise of the target. A white line, representing the  
200 participant’s confidence rating was initialized in the middle of the bar (50% confidence). As  
201 confidence increased towards 100%, the bar’s color changed from yellow to green. As  
202 confidence decreased towards 0%, the bar’s color changed from yellow to red. Participants

203 reported their confidence level with their left hand using the up and down arrows, and registered  
204 their confidence rating with the 'enter' key.

205

206 Experiment 1 included reach baseline, report practice, adaptation, and washout blocks (Figure  
207 1C). Baseline consisted of 24 trials (3 trials per target) with veridical online cursor feedback  
208 provided for the duration of the reach. Report practice consisted of 48 trials (6 trials per target)  
209 partitioned into the 'aim', confidence report,' and 'reach' phases. Veridical visual feedback was  
210 provided throughout all reaches, save the washout phase in Experiment 1. Adaptation consisted  
211 of 240 trials (30 trials per target) that included all three trial phases (Figure 1C). Crucially, during  
212 the reach phase the cursor was rotated by 30° (with CW/CCW rotations evenly counterbalanced  
213 across participants). Washout (Experiment 1 only) consisted of 48 reach trials (6 trials per  
214 target) with no cursor feedback provided for the duration of the reach, analogous to the baseline  
215 phase.

216 Experiment 2 included 16 baseline trials (2 per target), 16 report practice trials (2 per target),  
217 208 adaptation trials (26 per target) but no washout trials (Figure 1D). The adaptation trials  
218 differed from Experiment 1 only in terms of the rotation perturbation applied to the cursor. In  
219 Experiment 2, rotation angles of -60°, -45°, -30°, -15°, 15°, 30°, 45°, and 60° were pseudo-  
220 randomly applied across 24 blocks of 8 trial mini-blocks (3 x 8 trial mini-blocks per rotation  
221 angle, thus 192 rotation trials total). Four additional mini blocks consisting of 4 trials of 0°  
222 rotation were interleaved throughout adaptation. No specific rotation angle or sign was repeated  
223 consecutively (Figure 1D).

## 224 *Statistical Analysis*

225 Primary dependent variables were confidence judgements and recorded hand angles on every  
226 trial. Since participants were instructed to always adjust the confidence bar by at least one unit,  
227 all trials where the confidence rating remained at the initial 50% were removed (Exp. 1: 353 out  
228 of 5,184 trials [7.39%]; Exp. 2: 390 out of 4,480 trials [8.71%]). Data was analyzed using Matlab  
229 (Mathworks, Inc. Version 2022a). Model fits were computed using Matlab's *fmincon* function,  
230 minimizing the SSE between our confidence models and the confidence report data. Violin plots  
231 were generated using the *Violinplot* function in Matlab (22). Data and analysis code can be  
232 accessed at [https://github.com/ilestz/confidence\\_analysis](https://github.com/ilestz/confidence_analysis).

233

234 We validated model parameter optimization through parameter recovery and found we could  
235 achieve stable parameter fits throughout. To do this, we fit model-predicted confidence reports

236 using the model that initially generated these predictions and found that model parameters were  
237 recovered to 100% accuracy within 2 iterations of fitting.  $R^2$  values were computed through  
238 linear regression of model predictions and data. Reported  $\Delta AIC$  (23) values reflect differences in  
239 summed AIC values between each model and the winning model.

## 240 RESULTS

### 241 *Computational Modeling*

242 The goal of our study was to examine how motor learning relates to one's metacognitive  
243 judgments of their movement decisions. Participants performed a standard sensorimotor  
244 adaptation task while also reporting their confidence in each of their movements (i.e., chosen  
245 reach directions; Figure 1). We constructed computational models with the goal of predicting  
246 these subjective confidence reports on each trial. All four models characterized confidence  
247 reports (Equation 1) as deviations from a maximum confidence 'offset' that is proportional to an  
248 estimate of previous sensorimotor error(s):

249

$$250 \quad (1) \quad \textit{Confidence} = \textit{Confidence}_{max} - \eta * \textit{Error}$$

251

252 Where  $\eta$  represented an error scaling parameter. Here, "error" denotes the experienced "target  
253 error" (henceforth TE), the absolute angular error of the cursor relative to the target (though see  
254 later *Results* sections for alternatives). The first class of models we tested predict confidence  
255 based on the *current state of learning*. Specifically, these models relate confidence reports  
256 directly to the most recent error signal, representing a local "one-trial-back" (OTB) update rule.  
257 Within this model class, we tested two model variants. In the objective-error one-trial-back  
258 model (OTB<sub>obj</sub>), the true (i.e., actually observed) absolute error of the cursor relative to the target  
259 was used to compute confidence. However, previous work has shown that the cost of target  
260 errors are scaled subjectively via an approximate power-law (24). Thus, we also fit a subjective-  
261 error one-trial-back model (OTB<sub>subj</sub>), which scaled all target errors by an exponential free  
262 parameter,  $\gamma$ :

263

$$264 \quad (2) \quad \textit{Confidence}_t = \textit{Confidence}_{max} - \eta * TE_{t-1}^\gamma$$

265

266 An exponent  $\gamma > 1$  suggests that large target errors are perceived as relatively more salient  
267 (costly), and thus drive sharper decreases in confidence versus small errors in a manner that is



268 non-linearly proportional to the veridical error. In contrast,  $0 < \gamma < 1$  suggests that large errors  
269 are discounted relative to their veridical magnitude and thus drive weaker decreases in  
270 confidence than would be predicted by the objective error model. Finally,  $\gamma = 1$  reduces to the  
271 objective error case, where errors are not subjectively scaled, and confidence is linearly  
272 proportional to the veridical target error magnitude.

273

274 The second class of models involved retaining a sort of *memory* via estimating a running  
275 average of target errors across trials. This estimate is subsequently used to generate predicted  
276 confidence reports. We designed these “error-state-space” models to act as simple linear  
277 dynamical systems that update an estimate of the current error “state” on every trial through a  
278 canonical delta rule:

279

$$280 \quad (3) \quad \widehat{TE}_t = \widehat{TE}_{t-1} + \alpha \cdot \delta_{t-1}$$

$$281 \quad (4) \quad \delta_{t-1} = TE_{t-1} - \widehat{TE}_{t-1}$$

282

283 In effect, this learning rule constructs a recency-weighted average of the error state across trials  
284 and is similar to the learning rule employed in instrumental learning contexts for learning the  
285 predictive value of a given stimulus (25) and echoes state-space models used to model  
286 adaptation itself (26). The learning rate  $\alpha$  reflects the degree to which errors on previous trials  
287 are incorporated into the estimate, with high  $\alpha$  values (i.e., close to 1) reflecting a high degree of  
288 forgetting and low  $\alpha$  values (i.e., close to 0) reflecting a more historical memory of error across  
289 trials. Whenever the observed target error on the previous trial was greater than (less than) the  
290 estimated target error, the estimated target error would increase (decrease) by an amount  
291 proportional to this “metacognitive” prediction error.

292

293 Within this error-state-space (ESS) model class, there were again two distinct variants: The  
294 objective-error state-space model (ESS<sub>obj</sub>) computed the estimated error using the true veridical  
295 target errors, while the subjective-error state-space model (ESS<sub>subj</sub>) computed the estimated  
296 error using the subjectively scaled error with exponent  $\gamma$ :

297

$$298 \quad (5) \quad \delta_{t-1} = TE_{t-1}^\gamma - \widehat{TE}_{t-1}$$

299

300 Where the estimated error tracks a history of subjective errors, instead of objective errors.  
301 Nonetheless, both history (ESS) models used the same equation to generate predicted  
302 confidence reports (Equation 1), now using an evolving estimate of error state:

303

$$304 \quad (6) \quad \textit{Confidence} = \textit{Confidence}_{max} - \eta * T\hat{E}_t$$

305

306 Altogether, our 4 models share 2 free parameters – the maximum confidence offset and the  
307 error sensitivity scaling parameter  $\eta$ . Moreover, both models with nonlinear subjective error cost  
308 functions share the  $\gamma$  parameter. Finally, both models with error state-space tracking share an  
309 additional learning rate free parameter ( $\alpha$ ) relative to the one-trial-back models.

310

311 [Figure 1 here]

312

### 313 *Experiment 1*

314 We sought to explore how participants generate subjective judgements of their  
315 confidence in a motor learning task (Figure 1). Prior to performing a center out reaching motion,  
316 participants reported their intended reach direction and rated their confidence in that decision on  
317 a continuous scale (Figure 1B). After a brief baseline phase with veridical cursor feedback, a  
318 sensorimotor perturbation of 30° was applied (Figure 1C), which subjects rapidly learned to  
319 compensate for. Reach directions compensated well for the applied rotation, with a mean cursor  
320 error over the last 50 rotation trials of 0.51° (SD: 3.4°) (Fig. 2A). On average, reach directions  
321 compensated for 90% of the perturbation after ~8 trials.

322

323 [Figure 2 here]

324

325 During the unperturbed baseline phase of the experiment, confidence reports remained  
326 relatively stable but sharply decreased when the perturbation was applied, as expected.  
327 Unsurprisingly, all of our models of confidence were able to account for this decrease. Following  
328 the initial decrease in confidence, all participants gradually restored confidence to near baseline  
329 levels as their reaching errors decreased (Fig. 2B), which was also captured by all models.  
330 These expected observations provide initial support for the general form of Equation 1, where  
331 confidence is proportional to error.

332

333 To get a better picture of the dynamics of subjects' metacognitive judgments, we now turn to  
334 model comparisons. To reiterate the models tested: one class of models, the "one-trial-back"

335 models (Equation 2), predicted confidence reports on a given trial based on the current state of  
336 learning. The objective-error one-trial-back ( $OTB_{obj}$ ) model predicted confidence based on  
337 veridical absolute cursor errors relative to the target, and the subjective-error one-trial-back  
338 ( $OTB_{subj}$ ) model predicted confidence based on errors which were scaled by a power-law. The  
339 second class of models, the “error-state-space” models, kept track of an estimate of the average  
340 error on recent trials and used this average error to compute predicted confidence reports.  
341 Again, this class of models either kept track of objective errors ( $ESS_{obj}$  model) or subjectively  
342 scaled errors ( $ESS_{subj}$  model).

343

344 Of the four confidence models we developed, the  $ESS_{subj}$  best explained the variance in  
345 confidence reports ( $R^2=0.41\pm 0.23$  [mean $\pm$ SD]). At the individual level, 14 out of the 18 total  
346 subjects were better fit by the winning model versus the second-best model (Fig. 2C). Moreover,  
347 the  $ESS$  class of models robustly outperformed the  $OTB$  class (Fig. 2C; Table 1). This suggests  
348 that metacognitive judgments during sensorimotor learning incorporate a continually updated  
349 history of recent errors, rather than simply acting as a “read-out” of the current state of learning.  
350 Furthermore, confidence was better explained by a subjective error term rather than an  
351 objective one: The  $ESS_{subj}$  model better fit the confidence versus the  $ESS_{obj}$  model (Table 1). All  
352 model comparisons were robust, with AIC differences relative to the best-fitting model all  
353 exceeding 500.

354

355 While the results of Experiment 1 clearly favored the  $ESS_{subj}$  model, some limitations remained.  
356 First, because the rotation was of a single value ( $30^\circ$ ) and was fixed throughout the adaptation  
357 phase, the task was relatively easy. Thus, it was important to test if our modeling results  
358 generalized to a more complex environment, one where both errors and confidence reports  
359 would be more variable. Moreover, because of the nature of the task in Experiment 1, both  
360 learning curves and confidence reports monotonically increased together; a more variable  
361 environment would thus also help us rule out potential coincidental similarities in autocorrelation  
362 structure between our winning model and subjects’ learning curves as the key factor. To that  
363 end, in Experiment 2 we implemented a pseudo-randomly varying perturbation schedule. This  
364 allowed us to control for the aforementioned limitations, while also testing a novel question – are  
365 the dynamics of metacognitive confidence judgments during sensorimotor learning affected by  
366 environmental uncertainty?

367

368

[Table 1 here]

369

## 370 *Experiment 2*

371 Experiment 2 involved perturbations that fluctuated every few trials (i.e., the perturbation  
372 changed size and direction every 4 or 8 trials, see Figure 3A and *Methods*). This allowed us to  
373 perform a more strict test of our modeling approach, and to examine if and how environmental  
374 uncertainty affected subjective confidence reports. Specifically, we predicted that the  $ESS_{subj}$   
375 model would best account for subjective confidence ratings in this context, replicating  
376 Experiment 1. Moreover, we also hypothesized that while the fundamental process of  
377 confidence ratings would remain the same (i.e., the  $ESS_{subj}$  would again best explain behavior),  
378 the learning rate parameter of that model would increase in response to the increase in  
379 environmental uncertainty such that it would incorporate a more recency-biased history of errors  
380 (13).

381

382 Despite the more volatile nature of the perturbation schedule, participants were able to adapt  
383 their reach directions to account for the rotations (Fig. 3A). Excluding the transition trials where  
384 the rotation abruptly changes, subjects' average cursor error in the last two perturbation blocks  
385 was only  $6.3^\circ$  (SD:  $6.5^\circ$ ).

386

387 [Figure 3 here]

388

389 As in Experiment 1, confidence remained relatively stable during the unperturbed baseline but  
390 sharply decreased after the onset of the first perturbation (Fig. 3B). Confidence also tended to  
391 sharply decrease at the start of each new perturbation. Throughout the experiment, some 4-trial  
392 zero-rotation blocks were introduced, and these blocks tended to coincide with high confidence  
393 reports (Fig. 3B).

394

395 Once again, the  $ESS_{subj}$  model best predicted confidence reports in this experiment  
396 ( $R^2=0.42\pm 0.20$  [mean $\pm$ SD]), and the one-trial-back models were unable to account for the large  
397 fluctuations in confidence reports and performed significantly worse (Table 2). At the individual  
398 level, 18 out of the 20 total subjects were better fit by the winning model versus the second-best  
399 model (Fig. 3C). Both history (ESS) models again tracked confidence reports more accurately  
400 than the other class of models (OTB). Thus, our model comparison results closely replicated  
401 those of Experiment 1 (and again were robust; lowest AIC difference: 498). This further  
402 suggests that metacognitive judgements of sensorimotor learning incorporate a gradually

403 changing history of (subjectively scaled) errors. We do note that none of the four models were  
404 able to fully capture the unusually high confidence ratings seen during the zero-rotation blocks  
405 (see *Discussion*).

406

407 [Table 2 here]

408

#### 409 *Comparing model parameters across experiments*

410 While the variance in confidence reports was best explained in both experiments by the  
411 subjective-error history model, parameter values in each experiment were not necessarily the  
412 same. We explored how best fitting parameters in the  $ESS_{\text{subj}}$  model changed across tasks (Fig.  
413 4), with one key prediction that the metacognitive learning rate ( $\alpha$ ) would increase in Experiment  
414 2 versus Experiment 1 due to the increase in environmental volatility (13).

415

416 [Figure 3 here]

417

418 We first looked at the maximum confidence offset parameter (Fig. 4A). This parameter should  
419 not necessarily differ across experiments, as it reflects an individual's maximum level of  
420 confidence in the task on a somewhat arbitrary scale that should largely be independent of the  
421 dynamics of the perturbation schedule. In fact, regardless of experiment, this parameter should  
422 be close to maximal (i.e., 100) if participants are using the full range to make their confidence  
423 reports. Consistent with this hypothesis, this parameter was not significantly different across  
424 experiments (Wilcoxon rank sum test,  $Z=-0.63$ ,  $p=0.53$ ). The mean value of this parameter was  
425  $89\pm 11$  in Experiment 1 and  $91\pm 14$  in Experiment 2 (mean $\pm$ SD).

426

427 The subjective scaling of errors varied across both experiments (Fig. 4B). In Experiment 1, the  
428 mean exponent  $\gamma$  was 1.9 (SD: 0.95), indicating increased sensitivity to large errors. However,  $\gamma$   
429 values in Experiment 2 were significantly lower at  $0.46\pm 0.23$  (Wilcoxon Rank Sum,  $Z=-4.98$ ,  $p=$   
430  $6.2\times 10^{-7}$ ). The large difference in exponent values across experiments is expected, and likely  
431 reflects the fact that participants in Experiment 2 become habituated to large errors due to the  
432 volatility of the perturbation schedule, and thus likely learned to blunt the effect of these errors  
433 on their confidence reports. In contrast, in Experiment 1 errors were consistently very small,  
434 leading to the opposite effect. Thus, subjects appeared to alter how a subjective cost function of  
435 error shaped their confidence reports according to the distribution of errors they experienced.  
436 Consistent with an inherent trade-off between the exponent parameter and the sensitivity

437 parameter  $\eta$  (Equation 2), we also observed a significant change in  $\eta$  between experiments  
438 (Wilcoxon Rank Sum,  $Z=-4.49$ ,  $p=7.2\times 10^{-6}$ ) (Figure 4B). Specifically,  $\eta$  was on average more  
439 than 10 times larger in Experiment 2 than in Experiment 1 (Exp. 1:  $1.4\pm 2.9$ ; Exp. 2:  $15\pm 14$ ). (We  
440 note here that this parameter should not be over-interpreted, as it is primarily a scaling factor  
441 used to map error units onto confidence report units.)

442  
443 Finally, consistent with our hypothesis and with previous findings in reinforcement learning that  
444 learning rates in volatile environments are larger than those in stable environments (13), we  
445 observed that the error state-space learning rate  $\alpha$  more than doubled in Experiment 2 relative  
446 to Experiment 1 (Exp. 1:  $0.18\pm 0.15$ ; Exp. 2:  $0.41\pm 0.24$ ; Wilcoxon Rank Sum,  $Z = -3.08$ ,  $p =$   
447  $0.002$ ) (Figure 4D). Thus, the amount of “error history” that was incorporated into people’s  
448 metacognitive judgments was modulated based on second-order statistics of the learning  
449 environment. These parameter changes across experiments reflect the  $ESS_{\text{subj}}$  model’s  
450 flexibility in explaining fluctuations in confidence in both stable and volatile environments, and  
451 over different dynamic ranges of error. Taken together, our between-experiment parameter  
452 results (Fig. 4) suggest that subjects adapted the dynamic range and memory span of their  
453 confidence reports in a manner that reflected the statistics of the environment.

454  
455 *Fluctuations in confidence primarily track target errors*

456 In motor learning, compensation for errors often reflects two distinct processes, one explicit and  
457 one implicit (27–29). The explicit process is thought to primarily reflect cognitive aiming  
458 strategies meant to deliberately reduce motor errors (29, 30). In contrast, the implicit process is  
459 thought to instead reflect gradual adjustments to an internal model, which proceed largely  
460 outside of conscious awareness (29). So far, the models discussed have used target error to  
461 predict confidence reports. Importantly, target error itself reflects the consequences of both  
462 implicit and explicit learning processes (29, 31). Because our task design had us ask subjects  
463 about their confidence in an explicitly-reported movement plan, we could use a simple  
464 subtractive method to dissociate explicit and implicit learning components (29). In order to  
465 determine whether confidence reports may have been specifically sensitive to explicit or implicit  
466 motor adaptation processes rather than target error alone, we performed an additional model  
467 fitting analysis that used distinct error terms related to each component (see supplemental table  
468 T1).

469

470 In order to isolate the effect of the explicit component, we used the pre-reach aim reports (29).  
471 The explicit error component was quantified as the discrepancy between reported aim and the  
472 aim required to fully compensate for the rotation. The implicit error component can be isolated  
473 as the discrepancy between the true reach angle and the reported aim.

474  
475 In both experiments, confidence model fits to only the implicit error component were significantly  
476 worse than those fit to target error (Exp. 1:  $R^2=0.15\pm 0.19$ ,  $t(17)=-5.23$ ,  $p=6.2\times 10^{-5}$ ; Exp. 2:  
477  $R^2=0.27\pm 0.23$ ,  $t(19)=-5.74$ ),  $p=1.6\times 10^{-5}$ ; Supplemental Table T1). Additionally, in Experiment 1,  
478 the model fit using the explicit component was significantly worse than the model using target  
479 error ( $R^2=0.27\pm 0.26$ ,  $t(17)=-3.59$ ,  $p=0.002$ ). However, in experiment 2, the model fit on the  
480 explicit component was not significantly different to the model using target error ( $R^2=0.37\pm 0.21$ ,  
481  $t(19)=-1.61$ ,  $p=0.12$ ). This makes sense – due to the volatile nature of the perturbation’s sign  
482 and magnitude in Experiment 2, very little consistent implicit learning can accrue, meaning that  
483 the explicit error component is similar to the target error. As expected, confidence models using  
484 the explicit error component captured significantly more variance in confidence reports than  
485 confidence models dependent on the implicit error component in both experiments (Exp. 1:  
486  $t(17)=2.82$ ,  $p=0.01$ ; Exp. 2:  $t(19)=2.34$ ,  $p=0.03$ ). Taken together, these additional analyses  
487 support the reasonable conclusion that the actually observed performance state – the target  
488 error – determines the dynamics of metacognitive judgments during sensorimotor learning.

## 489 DISCUSSION

490 This current study is the first, to our knowledge, to examine the relationship between subjective  
491 confidence judgments and motor errors in the context of sensorimotor adaptation. We  
492 investigated this relationship via two sensorimotor learning experiments that differed with  
493 respect to the environmental volatility (i.e., the perturbation schedule applied). We constructed  
494 computational models with the goal of predicting subjective confidence reports on each trial. We  
495 specified a set of models where trial-by-trial subjective confidence tracked only the current  
496 learning state (i.e., the most recent performance error), and another set of models where  
497 confidence judgments are approximated by a simple linear dynamic system that tracks a  
498 recency-weighted history of errors made during learning.

499  
500 In Experiment 1, an error history model that used a subjective error term – the  $ESS_{\text{subj}}$  model –  
501 was best able to account for the confidence data in the context of a fixed perturbation schedule.

502 The  $ESS_{\text{subj}}$  model had greater numerical agreement with confidence judgments over a veridical  
503 error model ( $ESS_{\text{obj}}$ ) model throughout the experiment. In control analyses (see supplemental  
504 table T1), parsing the relative contributions of implicit and explicit error components indicated  
505 that, in a static learning context, metacognitive judgements primarily track the observed  
506 performance state (target error).

507

508 In Experiment 2 subjects learned in a volatile context, and the  $ESS_{\text{subj}}$  model was best able to  
509 account for the large fluctuations in confidence reports we observed. The  $ESS_{\text{subj}}$  model again  
510 had greater numerical agreement with confidence judgments over the  $ESS_{\text{obj}}$  model throughout  
511 the experiment, replicating the results reported for Experiment 1. Taken together, these findings  
512 demonstrate that confidence reports during sensorimotor adaptation are well approximated by a  
513 running average of recent (subjectively-scaled) performance errors. To wit, these findings  
514 suggest that when people make metacognitive judgments of their own state of sensorimotor  
515 learning, they incorporate a recent history of errors rather than just taking a snapshot of their  
516 current performance state.

517

518 Comparing model parameters between experiments provides key insights into the dynamics of  
519 metacognitive judgements of performance during sensorimotor adaptation. Although the range  
520 of confidence ratings are relative to individual participants, the similarity in the maximum  
521 confidence offset parameter between experiments suggests that participants operate within a  
522 comparable confidence range (Fig. 4A). The significant difference in the subjective error scaling  
523 exponents and error sensitivity parameters between experiments (Fig. 4b-c) was expected  
524 given the differences in perturbation schedules between experimental contexts. That is,  
525 participants scaled the subjective cost functions that shaped their confidence reports according  
526 to the distribution of errors they experienced. A large exponent in Experiment 1 indicated a non-  
527 linear increase in sensitivity to large errors when the environment was stable and errors were  
528 generally small. In contrast, a small exponent in Experiment 2 indicated that participants down-  
529 weighted large errors, likely due to an increased range of errors. These results show that the  
530 relationship between motor errors and confidence judgements was sensitive to the range of  
531 errors experienced. A number of previous studies that investigated the cost-function associated  
532 with errors in the context of sensorimotor control and learning have shown that people apply a  
533 non-linear cost-function that increases quadratically for small errors and significantly less than  
534 quadratically for large errors (24). We see a similar trend in our results (Experiment 2).

535



536 Learning rates in our confidence model were significantly larger in Experiment 2, consistent with  
537 our hypothesis that they would be higher in the more volatile environment. These results  
538 comport with previous work in reinforcement learning, showing that a higher learning rate is  
539 more useful in a volatile environment because history is less informative (13). Our findings are  
540 consistent with these results, extending them to the dynamics of metacognitive judgments  
541 during motor learning. Future studies that parametrically alter aspects of the learning  
542 environment (e.g., consistency and variability, (10)) and measuring their effects on  
543 metacognitive judgements could be useful for developing more detailed models of confidence  
544 during motor learning.

545  
546 What are the psychological mechanisms that track the error-state used for metacognitive  
547 judgments? Although our models are straightforward and principally descriptive, they do  
548 constrain the time-scale at which error-signals are integrated, hinting at a role for memory in the  
549 process of subjective confidence formation. We speculate that working memory is likely  
550 important in the formation of confidence judgments during motor learning (32, 33). That is,  
551 participants may track the quality of their performance by storing recent outcomes in working  
552 memory and integrating them into an estimate of the “state” of their performance. If this is  
553 correct, one prediction is that disrupting working memory may alter the relationship between  
554 confidence and recent errors. Future studies, perhaps using dual tasks, could test this  
555 prediction.

556  
557 The prospect that higher-level metacognitive judgements accurately track lower-level  
558 sensorimotor properties (e.g., visual error magnitudes) compels the search for overlapping  
559 neural correlates. In the context of sensorimotor learning, confidence can be defined as a  
560 higher-order variable that corresponds to the uncertainty that underpins the learning process  
561 (14, 15). Multiple neural regions capable of representing sensory uncertainty have been  
562 proposed, including the orbitofrontal cortex (OFC) (34, 35), midbrain (36), anterior cingulate  
563 cortex (ACC) (37), insula (38, 39), and prefrontal cortex (PFC) (40, 41). In terms of  
564 representations of confidence, activity in the rostromedial and dorsolateral PFC (rIPFC/DLPFC)  
565 is purported to be central to the processing of explicit confidence judgements in decision making  
566 (42–45). It may be that some of these regions, in addition to areas involved in working memory,  
567 could show functional correlations to the variables we have modeled here. That is, studies  
568 leveraging our model (or similar ones) could attempt to track or disrupt neural correlates of

569 metacognitive variables during motor learning – such as the estimated error state (Equation 3)  
570 or metacognitive prediction errors (Equation 4) – using techniques like fMRI and TMS.

571  
572 We note several limitations in our study. First, simple adaptation tasks should not be conflated  
573 with true motor skill learning (20); measuring confidence judgments in more complex motor skill  
574 learning tasks will be essential for asking if our models generalize. Second, many models of  
575 confidence take a Bayesian approach (12), explicitly modeling sensory uncertainty as a key  
576 component of confidence. We took a simpler approach here by focusing on the overall  
577 dynamics of confidence judgments during visuomotor learning. Future studies could also  
578 incorporate uncertainty in other forms (e.g., sensory feedback, increased motor noise, etc.) to  
579 further develop our models in a more probabilistic framework. Third, in Experiment 2 we noticed  
580 some surprisingly high-confidence moments that were not easily captured by our models,  
581 suggesting that there are likely other biases affecting confidence (46). Modeling these biases  
582 will be an important future step as well.

583  
584 In conclusion, here we show that a simple, straightforward Markovian learning rule was able to  
585 capture people's confidence ratings as they adapted to a novel sensorimotor perturbation (Figs.  
586 2-3; Tables 1-2). Our model showed that people's metacognitive judgment of their motor  
587 performance, operationalized as explicit confidence judgments in their movement intentions,  
588 appeared to incorporate a recency-weighted history of subjectively scaled sensorimotor errors.  
589 This model was robust to different learning environments and altered how observed errors  
590 influenced metacognition based on the specific statistics of the learning environment (Fig. 4).  
591 Our findings provide a foundation for future studies to investigate sensorimotor confidence  
592 during more real-world learning tasks, and to localize its correlates in the brain.

593

## 594 Acknowledgements

595 We thank Ryan Morehead, Jordan Taylor, Huw Jarvis, and the ACT lab for helpful discussions.  
596 C.L.H was funded by Yale University's Seesel Postdoctoral Fellowship.

## 597 Supplemental Table

598 [Table S1 here]



## 600 Bibliography

601

- 602 1. **Pollack I, Decker LR.** Confidence Ratings, Message Reception, and the Receiver  
603 Operating Characteristic. *J Acoust Soc Am* 30: 286–292, 1958. doi: 10.1121/1.1909571.
- 604 2. **Lebreton M, Bacily K, Palminteri S, Engelmann JB.** Contextual influence on confidence  
605 judgments in human reinforcement learning. *PLOS Comput Biol* 15: e1006973, 2019. doi:  
606 10.1371/journal.pcbi.1006973.
- 607 3. **Heyes C, Bang D, Shea N, Frith CD, Fleming SM.** Knowing Ourselves Together: The  
608 Cultural Origins of Metacognition. *Trends Cogn Sci* 24: 349–362, 2020. doi:  
609 10.1016/j.tics.2020.02.007.
- 610 4. **Koriat A.** How do we know that we know? The accessibility model of the feeling of  
611 knowing. *Psychol Rev* 100: 609–639, 1993. doi: 10.1037/0033-295X.100.4.609.
- 612 5. **Henmon VAC.** The relation of the time of a judgment to its accuracy. *Psychol Rev* 18:  
613 186–201, 1911. doi: 10.1037/h0074579.
- 614 6. **Yeung N, Summerfield C.** Metacognition in human decision-making: confidence and error  
615 monitoring. *Philos Trans R Soc B Biol Sci* 367: 1310–1321, 2012. doi:  
616 10.1098/rstb.2011.0416.
- 617 7. **Sanders JI, Hangya B, Kepecs A.** Signatures of a Statistical Computation in the Human  
618 Sense of Confidence. *Neuron* 90: 499–506, 2016. doi: 10.1016/j.neuron.2016.03.025.
- 619 8. **Fleming SM, Daw ND.** Self-evaluation of decision-making: A general Bayesian framework  
620 for metacognitive computation. *Psychol Rev* 124: 91–114, 2017. doi: 10.1037/rev0000045.
- 621 9. **Kiani R, Shadlen MN.** Representation of Confidence Associated with a Decision by  
622 Neurons in the Parietal Cortex. *Science* 324: 759–764, 2009. doi:  
623 10.1126/science.1169405.
- 624 10. **Gonzalez Castro LN, Hadjiosif AM, Hemphill MA, Smith MA.** Environmental  
625 Consistency Determines the Rate of Motor Adaptation. *Curr Biol* 24: 1050–1061, 2014. doi:  
626 10.1016/j.cub.2014.03.049.
- 627 11. **Meyniel F, Schlunegger D, Dehaene S.** The Sense of Confidence during Probabilistic  
628 Learning: A Normative Account. *PLOS Comput Biol* 11: e1004305, 2015. doi:  
629 10.1371/journal.pcbi.1004305.
- 630 12. **Meyniel F, Sigman M, Mainen ZF.** Confidence as Bayesian Probability: From Neural  
631 Origins to Behavior. *Neuron* 88: 78–92, 2015. doi: 10.1016/j.neuron.2015.09.039.
- 632 13. **Behrens TEJ, Woolrich MW, Walton ME, Rushworth MFS.** Learning the value of  
633 information in an uncertain world. *Nat Neurosci* 10: 1214–1221, 2007. doi:  
634 10.1038/nn1954.
- 635 14. **Nassar MR, Wilson RC, Heasley B, Gold JI.** An Approximately Bayesian Delta-Rule Model  
636 Explains the Dynamics of Belief Updating in a Changing Environment. *J Neurosci* 30:  
637 12366–12378, 2010. doi: 10.1523/JNEUROSCI.0822-10.2010.
- 638 15. **Payzan-LeNestour E, Bossaerts P.** Risk, Unexpected Uncertainty, and Estimation  
639 Uncertainty: Bayesian Learning in Unstable Settings. *PLOS Comput Biol* 7: e1001048,  
640 2011. doi: 10.1371/journal.pcbi.1001048.
- 641 16. **Moskowitz JB, Gale DJ, Gallivan JP, Wolpert DM, Flanagan JR.** Human decision  
642 making anticipates future performance in motor learning. *PLOS Comput Biol* 16:  
643 e1007632, 2020. doi: 10.1371/journal.pcbi.1007632.
- 644 17. **Frömer R, Nassar MR, Bruckner R, Stürmer B, Sommer W, Yeung N.** Response-based  
645 outcome predictions and confidence regulate feedback processing and learning. *eLife* 10:  
646 e62825, 2021. doi: 10.7554/eLife.62825.
- 647 18. **Simon DA, Bjork RA.** Metacognition in motor learning. *J Exp Psychol Learn Mem Cogn*  
648 27: 907–912, 2001. doi: 10.1037/0278-7393.27.4.907.

- 649 19. **Fassold ME, Locke SM, Landy MS.** Feeling lucky? Prospective and retrospective cues  
650 for sensorimotor confidence. *Neuroscience*.
- 651 20. **Krakauer JW, Hadjiosif AM, Xu J, Wong AL, Haith AM.** Motor Learning. *Compr Physiol*  
652 9: 613–663, 2019. doi: 10.1002/cphy.c170043.
- 653 21. **Oldfield RC.** The assessment and analysis of handedness: the Edinburgh inventory.  
654 *Neuropsychologia* 9: 97–113, 1971.
- 655 22. **Bechtold B, Fletcher P, Seamusholden, Gorur-Shandilya S.** bastibe/Violinplot-Matlab:  
656 A Good Starting Point. Zenodo: 2021.
- 657 23. **Akaike H.** A new look at the statistical model identification. *IEEE Trans Autom Control* 19:  
658 716–723, 1974. doi: 10.1109/TAC.1974.1100705.
- 659 24. **Körding KP, Wolpert DM.** The loss function of sensorimotor learning. *Proc Natl Acad Sci*  
660 101: 9839–9842, 2004. doi: 10.1073/pnas.0308394101.
- 661 25. **Rescorla RA, Wagner AR.** A Theory of Pavlovian Conditioning: Variations in the  
662 Effectiveness of Reinforcement and Nonreinforcement. In: *Classical conditioning II: current*  
663 *research and theory*. New York: Appleton-Century-Crofts, 1972, p. 64–99.
- 664 26. **Thoroughman KA, Shadmehr R.** Learning of action through adaptive combination of  
665 motor primitives. *Nature* 407: 742–747, 2000. doi: 10.1038/35037588.
- 666 27. **Mazzoni P, Krakauer JW.** An Implicit Plan Overrides an Explicit Strategy during  
667 Visuomotor Adaptation. *J Neurosci* 26: 3642–3645, 2006. doi: 10.1523/JNEUROSCI.5317-  
668 05.2006.
- 669 28. **McDougle SD, Ivry RB, Taylor JA.** Taking Aim at the Cognitive Side of Learning in  
670 Sensorimotor Adaptation Tasks. *Trends Cogn Sci* 20: 535–544, 2016. doi:  
671 10.1016/j.tics.2016.05.002.
- 672 29. **Taylor JA, Krakauer JW, Ivry RB.** Explicit and implicit contributions to learning in a  
673 sensorimotor adaptation task. *J Neurosci Off J Soc Neurosci* 34: 3023–3032, 2014. doi:  
674 10.1523/JNEUROSCI.3619-13.2014.
- 675 30. **McDougle SD, Taylor JA.** Dissociable cognitive strategies for sensorimotor learning. *Nat*  
676 *Commun* 10, 2019. doi: 10.1038/s41467-018-07941-0.
- 677 31. **Morehead JR, Xivry J-JO de.** A Synthesis of the Many Errors and Learning Processes of  
678 Visuomotor Adaptation. .
- 679 32. **Smith JD, Coutinho MVC, Church BA, Beran MJ.** Executive-attentional uncertainty  
680 responses by rhesus macaques (*Macaca mulatta*). *J Exp Psychol Gen* 142: 458–475,  
681 2013. doi: 10.1037/a0029601.
- 682 33. **Coutinho MVC, Redford JS, Church BA, Zakrzewski AC, Couchman JJ, Smith JD.**  
683 The interplay between uncertainty monitoring and working memory: Can metacognition  
684 become automatic? *Mem Cognit* 43: 990–1006, 2015. doi: 10.3758/s13421-015-0527-1.
- 685 34. **Tobler PN, O’Doherty JP, Dolan RJ, Schultz W.** Reward value coding distinct from risk  
686 attitude-related uncertainty coding in human reward systems. *J Neurophysiol* 97: 1621–  
687 1632, 2007.
- 688 35. **Critchley HD, Mathias CJ, Dolan RJ.** Neural activity in the human brain relating to  
689 uncertainty and arousal during anticipation. *Neuron* 29: 537–545, 2001.
- 690 36. **Preusschoff K, Bossaerts P, Quartz SR.** Neural differentiation of expected reward and  
691 risk in human subcortical structures. *Neuron* 51: 381–390, 2006.
- 692 37. **Ma WJ, Jazayeri M.** Neural Coding of Uncertainty and Probability. *Annu Rev Neurosci* 37:  
693 205–220, 2014. doi: 10.1146/annurev-neuro-071013-014017.
- 694 38. **Schultz W, Preusschoff K, Camerer C, Hsu M, Fiorillo CD, Tobler PN, Bossaerts P.**  
695 Explicit neural signals reflecting reward uncertainty. *Philos Trans R Soc B Biol Sci* 363:  
696 3801–3811, 2008.
- 697 39. **Huetzel SA, Song AW, McCarthy G.** Decisions under uncertainty: probabilistic context  
698 influences activation of prefrontal and parietal cortices. *J Neurosci* 25: 3304–3311, 2005.
- 699 40. **Vilares I, Howard JD, Fernandes HL, Gottfried JA, Kording KP.** Differential

- 700 representations of prior and likelihood uncertainty in the human brain. *Curr Biol* 22: 1641–  
701 1648, 2012.
- 702 41. **Ting C-C, Yu C-C, Maloney LT, Wu S-W.** Neural mechanisms for integrating prior  
703 knowledge and likelihood in value-based probabilistic inference. *J Neurosci* 35: 1792–  
704 1805, 2015.
- 705 42. **Cortese A.** Metacognitive resources for adaptive learning. *Neurosci Res* 178: 10–19,  
706 2022. doi: 10.1016/j.neures.2021.09.003.
- 707 43. **Fleming SM, Weil RS, Nagy Z, Dolan RJ, Rees G.** Relating introspective accuracy to  
708 individual differences in brain structure. *Science* 329: 1541–1543, 2010.
- 709 44. **Lau HC, Passingham RE.** Relative blindsight in normal observers and the neural correlate  
710 of visual consciousness. *Proc Natl Acad Sci* 103: 18763–18768, 2006.
- 711 45. **Rounis E, Maniscalco B, Rothwell JC, Passingham RE, Lau H.** Theta-burst transcranial  
712 magnetic stimulation to the prefrontal cortex impairs metacognitive visual awareness. *Cogn*  
713 *Neurosci* 1: 165–175, 2010.
- 714 46. **Lebreton M, Langdon S, Slieker MJ, Nooitgedacht JS, Goudriaan AE, Denys D, van**  
715 **Holst RJ, Luigjes J.** Two sides of the same coin: Monetary incentives concurrently  
716 improve and bias confidence judgments. *Sci Adv* 4: eaaq0668, 2018. doi:  
717 10.1126/sciadv.aaq0668.

718

719

720

## 721 Captions

722 **Figure 1.** Experimental Design. (A) Experimental apparatus. Participants made reaching movements over  
723 a digitizing tablet while holding an air hockey paddle. (B) Schematic of two example trials. Participants  
724 first moved a crosshair to specify their intended reach direction (“Aim”), then rated their confidence in that  
725 decision (“Report”), and finally executed their reach with feedback (“Reach”). (C) Perturbation schedule in  
726 Experiment 1. (D) Perturbation schedule in Experiment 2.

727  
728 **Figure 2.** Learning curves and model fitting for Experiment 1 (N=18). (A) Learning curve. Participants  
729 adapted their reach angle in response to the 30° perturbation and showed significant aftereffects in a  
730 washout phase. (B) Mean confidence reports (gray) and winning model fit (green). (C) *Top*: AIC  
731 differences between best and second-best model are shown for each subject (negative values represent  
732 better fits for the winning model,  $ESS_{\text{Subj}}$ ). *Bottom*: Summed AIC values relative to the summed AIC value  
733 for the winning model. All error shading = 1 S.E.M.

734  
735 **Figure 3.** Learning curves and model fitting for Experiment 2 (N=20). (A) Learning curve. Participants  
736 adapted their reaches (green) to account for the volatile perturbation schedule (gray). (B) Mean  
737 confidence reports (gray) and winning model fit (green;  $ESS_{\text{Subj}}$ ). (C) *Top*: AIC differences between best  
738 and second-best model are shown for each subject (negative values represent better fits for the winning  
739 model,  $ESS_{\text{Subj}}$ ). *Bottom*: Summed AIC values relative to the summed AIC value for the winning model. All  
740 error shading = 1 S.E.M.

741  
742 **Figure 4.** Parameter comparison across Experiments 1 and 2. Green shaded regions reflect the  
743 distribution of participant parameter values. White dots indicate median parameter values and gray bars  
744 the interquartile range (IQR) between the first and third quartiles. Whiskers extend to 1.5 times the IQR.  
745 (A) Maximum confidence offset parameters were not different across experiments and were generally  
746 close to the maximum. (B) Subjective scaling of errors via the exponential parameter was significantly  
747 different across experiments. (C) The sensitivity parameter was significantly larger in Experiment 2. (D)  
748 Learning rates were significantly larger in Experiment 2, consistent with the hypothesis that learning rates  
749 would be higher in the more volatile environment.

750  
751 **Table 1.**  $\Delta AIC$  are summed AIC values relative to the winning model. Abbreviations: AIC, Akaike  
752 Information Criterion; SD, standard deviation; ESS, error-state-space models; OTB, one-trial-back  
753 models.

754  
755 **Table 2.**  $\Delta AIC$  are summed AIC values relative to the winning model. Abbreviations: AIC, Akaike  
756 Information Criterion; SD, standard deviation; ESS, error-state-space models; OTB, one-trial-back  
757 models.

758  
759 **Table T1.** *Note.* T-tests are compared to target error model  $R^2$ , unless stated otherwise. Abbreviations:  
760 df, degrees of freedom, SD, standard deviation.

761

762 Figures

763 Figure 1.

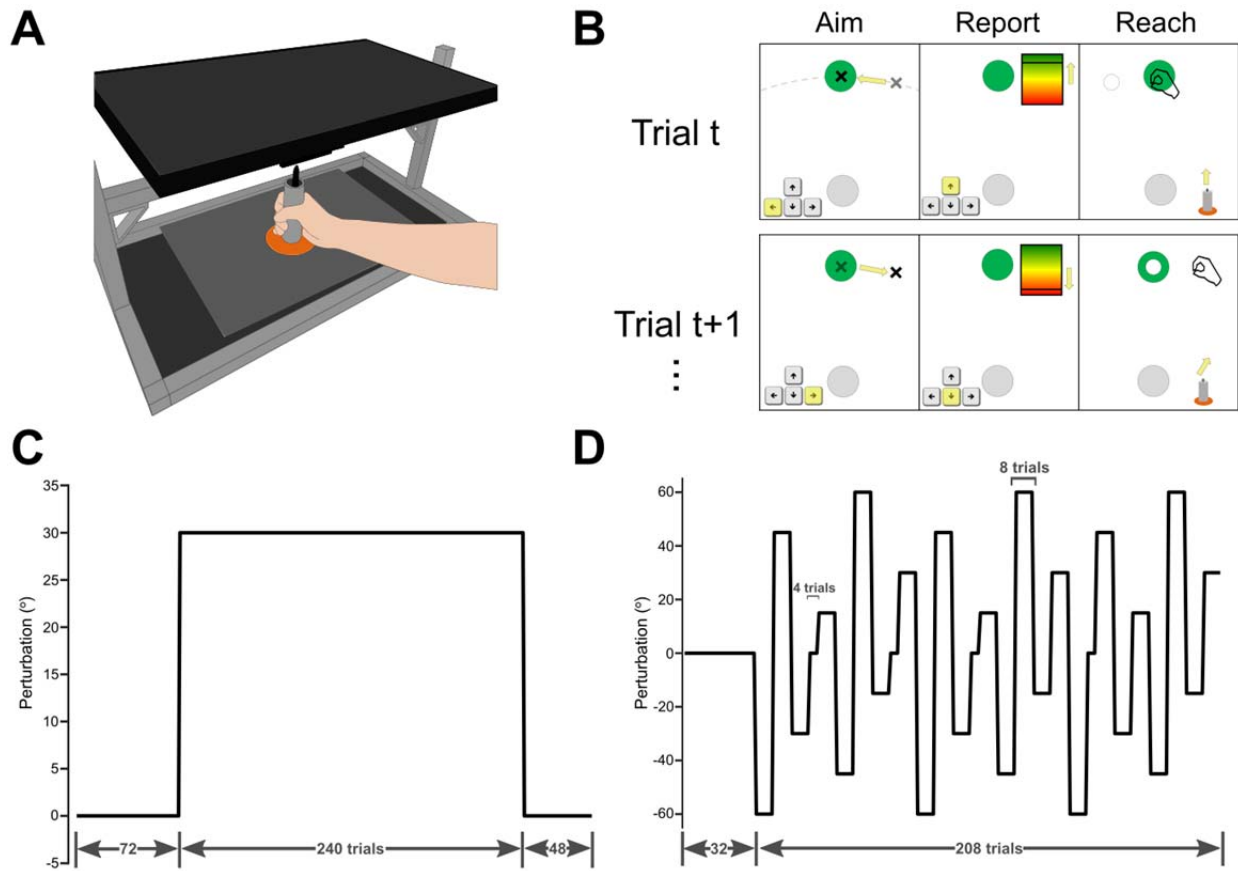

764  
765  
766



767 **Figure 2.**

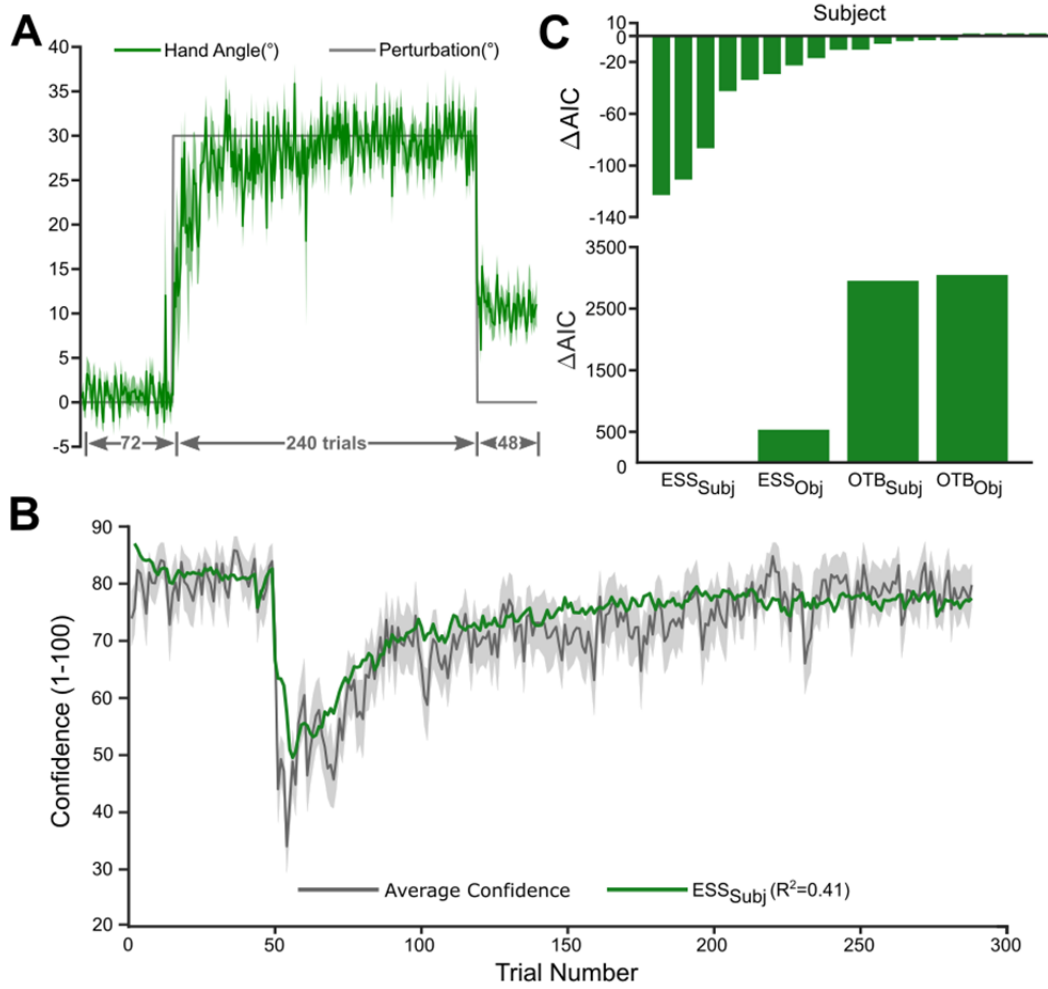

768

769

770 **Figure 3.**

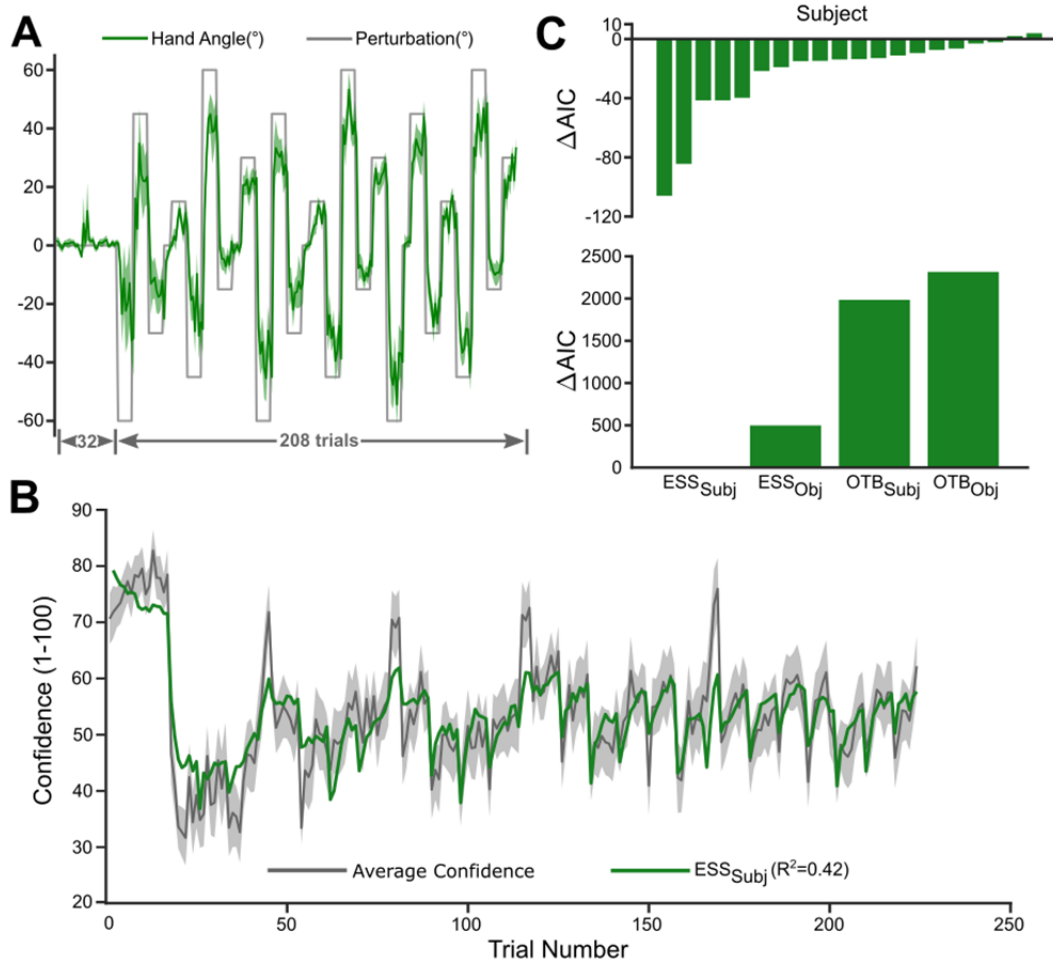

771

772

773 **Figure 4.**

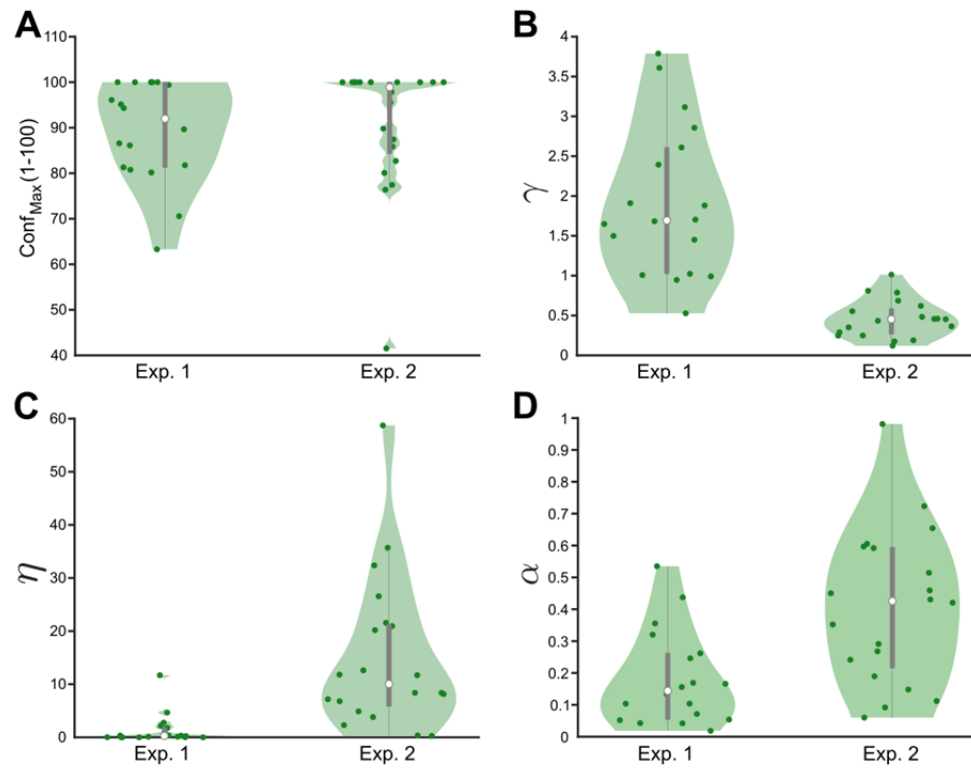

774

775

776 **Tables**

777

778 ***Table 1. Model Fit  $R^2$  and  $\Delta AIC$  Values in Experiment 1***

| Model               | $R^2$ (SD)      | $\Delta AIC$ |
|---------------------|-----------------|--------------|
| ESS <sub>subj</sub> | 0.4066 (0.2321) | ---          |
| ESS <sub>obj</sub>  | 0.3587 (0.2272) | 525.5        |
| OTB <sub>subj</sub> | 0.1417 (0.0667) | 2943         |
| OTB <sub>obj</sub>  | 0.1208 (0.0540) | 3038         |

779

780

781 **Table 2. Model Fit  $R^2$  and  $\Delta AIC$  Values in Experiment 2**

| Model               | $R^2$ (SD)      | $\Delta AIC$ |
|---------------------|-----------------|--------------|
| ESS <sub>subj</sub> | 0.4207 (0.1974) | ---          |
| ESS <sub>obj</sub>  | 0.3539 (0.1848) | 498.1        |
| OTB <sub>subj</sub> | 0.2373 (0.1009) | 1984         |
| OTB <sub>obj</sub>  | 0.1741 (0.0830) | 2316         |

782

783 Supplemental Table

784

**Table T1. Model Fit  $R^2$  upon Isolating Explicit and Implicit Components**

| Model                              | $R^2$ (SD)  | t     | df | p                       |
|------------------------------------|-------------|-------|----|-------------------------|
| <i>Experiment 1</i>                |             |       |    |                         |
| Cursor Error (Explicit + Implicit) | 0.41 (0.23) | --    | -- | --                      |
| Explicit Component                 | 0.27 (0.26) | -3.59 | 17 | 0.002**                 |
| Implicit Component                 | 0.15 (0.19) | -5.23 | 17 | $6.2 \times 10^{-5}$ ** |
| Explicit vs Implicit               |             | 2.82  | 17 | 0.01*                   |
| <i>Experiment 2</i>                |             |       |    |                         |
| Cursor Error (Explicit + Implicit) | 0.42 (0.20) | --    | -- | --                      |
| Explicit Component                 | 0.37 (0.21) | -1.61 | 19 | 0.12                    |
| Implicit Component                 | 0.27 (0.23) | -5.74 | 19 | $1.6 \times 10^{-5}$ ** |
| Explicit vs Implicit               |             | 2.34  | 19 | 0.03*                   |

785
